RESEARCH ARTICLE

# Application of Machine Learning Techniques to High-Dimensional Clinical Data to Forecast Postoperative Complications

Paul Thottakkara<sup>1,3</sup>, Tezcan Ozrazgat-Baslanti<sup>1</sup>, Bradley B. Hupf<sup>1</sup>, Parisa Rashidi<sup>2</sup>, Panos Pardalos<sup>3</sup>, Petar Momcilovic<sup>3</sup>, Azra Bihorac<sup>1\*</sup>

**1** Department of Anesthesiology, College of Medicine, University of Florida, Gainesville, Florida, United States of America, **2** Biomedical Engineering Department, University of Florida, Gainesville, Florida, United States of America, **3** Industrial and Systems Engineering, University of Florida, Gainesville, Florida, United States of America

\* [abihorac@anest.ufl.edu](mailto:abihorac@anest.ufl.edu)

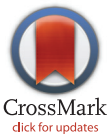

CrossMark  
click for updates

 OPEN ACCESS

**Citation:** Thottakkara P, Ozrazgat-Baslanti T, Hupf BB, Rashidi P, Pardalos P, Momcilovic P, et al. (2016) Application of Machine Learning Techniques to High-Dimensional Clinical Data to Forecast Postoperative Complications. *PLoS ONE* 11(5): e0155705. doi:10.1371/journal.pone.0155705

**Editor:** Zhongcong Xie, Massachusetts General Hospital, UNITED STATES

**Received:** December 7, 2015

**Accepted:** April 5, 2016

**Published:** May 27, 2016

**Copyright:** © 2016 Thottakkara et al. This is an open access article distributed under the terms of the [Creative Commons Attribution License](https://creativecommons.org/licenses/by/4.0/), which permits unrestricted use, distribution, and reproduction in any medium, provided the original author and source are credited.

**Data Availability Statement:** Data analyzed are restricted, as they contain identifiers such as zip codes and dates and can not be shared in its current form. However, the data can be provided as a de-identified dataset from University of Florida Integrated Data Repository (contact is Gigi Lipori; [pfluggg@shands.ufl.edu](mailto:pfluggg@shands.ufl.edu)) after IRB approval (University of Florida IRB contact is Peter Iafraite; [iafraite@ufl.edu](mailto:iafraite@ufl.edu)).

**Funding:** Funding provided by P50 GM-111152 National Institute of General Medical Sciences <http://www.nigms.nih.gov>; AB TOB, Vision Grant Society of

## Abstract

### Objective

To compare performance of risk prediction models for forecasting postoperative sepsis and acute kidney injury.

### Design

Retrospective single center cohort study of adult surgical patients admitted between 2000 and 2010.

### Patients

50,318 adult patients undergoing major surgery.

### Measurements

We evaluated the performance of logistic regression, generalized additive models, naïve Bayes and support vector machines for forecasting postoperative sepsis and acute kidney injury. We assessed the impact of feature reduction techniques on predictive performance. Model performance was determined using the area under the receiver operating characteristic curve, accuracy, and positive predicted value. The results were reported based on a 70/30 cross validation procedure where the data were randomly split into 70% used for training the model and the 30% for validation.

### Main Results

The areas under the receiver operating characteristic curve for different models ranged between 0.797 and 0.858 for acute kidney injury and between 0.757 and 0.909 for severe sepsis. Logistic regression, generalized additive model, and support vector machines had better performance compared to Naïve Bayes model. Generalized additive models

Critical Care Medicine <http://www.sccm.org>: AB, Astute Medial, Inc <http://www.astutemedical.com/US/Home>: AB, I Heermann Anesthesia Foundation, Inc: AB and NIH/NCATS Clinical and Translational Sciences Award: University of Florida UL1: TR000064. The funders had no role in study design, data collection and analysis, decision to publish, or preparation of the manuscript.

**Competing Interests:** The authors have declared that no competing interests exist.

additionally accounted for non-linearity of continuous clinical variables as depicted in their risk patterns plots. Reducing the input feature space with LASSO had minimal effect on prediction performance, while feature extraction using principal component analysis improved performance of the models.

## Conclusions

Generalized additive models and support vector machines had good performance as risk prediction model for postoperative sepsis and AKI. Feature extraction using principal component analysis improved the predictive performance of all models.

## Introduction

Postoperative complications are significant sources of morbidity and mortality leading to a multi-fold increase in costs and adverse long-term consequences [1]. Postoperative sepsis and acute kidney injury (AKI) are well-recognized risk factors for short and long term morbidity and mortality after surgery [2–7]. Furthermore, development of AKI during sepsis increases patient morbidity, predicts higher mortality and has a significant effect on multiple organ functions [8]. There is an increasing interest in predicting the probability of postoperative complications in order to improve risk stratification prior to surgery and to allow timely use of preventive therapies during surgery and anesthesia. Assessment of this risk requires timely, accurate and dynamic synthesis of the large amount of clinical information in the preoperative period. Current preoperative risk stratification is limited to a physician's subjective risk assessment or risk scores that often require elaborate data extraction [9, 10]. While the majority of existing preoperative AKI risk scores are limited to cardiac surgery and have modest accuracy [11, 12], tools for preoperative risk stratification for severe sepsis are missing.

Multivariate regression models are traditionally used for risk prediction in medical research due to their ease of result interpretation and analysis but machine learning classifiers have gained momentum in biomedical research during the past few years with the availability of electronic health records and more complex medical data. Even though the choice of risk prediction model plays a role in generating robust and accurate risk prediction, data cleaning and preprocessing are equally important for model performance [13–15]. There is no consensus about the best choice of mathematical function for predictive models in terms of their performance, and studies have shown relative performance comparisons only on a case-by-case basis [16–25]. Since the dimension of the dataset, including the number and complexity of variables, is an important determinant of the predictive performance, the optimal choice of techniques for reducing data dimensionality is equally important [26].

Using all available preoperative clinical and administrative data in a large retrospective cohort of surgical patients, we studied the effect of data preprocessing, modeling options, and dimensionality reduction on the prediction performance of the models forecasting the risk of postoperative AKI and sepsis prior to surgery.

## Methods

### Source of Data

The study was approved by the UF Institutional Review Board and Privacy Office as exempt study with waiver for informed consent. Using the University of Florida Health Integrated

Data Repository as Honest Broker for data de-identification we have created perioperative dataset (DECLARE) that integrated multiple databases within the health system as previously described [4]. Using residency zip code, we have link registry data to the United State Census data [27] to calculate residing neighborhood characteristics and distance from hospital using `sp` package in R [28]. We included all inpatient operative procedures requiring at least 24 hours hospital stay performed between January 1, 2000 and November 30, 2010.

## Participants

We included all patients with age greater or equal to 18 years admitted to the hospital for longer than 24 hours following any type of inpatient operative procedure. We excluded patients with end-stage renal disease on admission as identified by the previously validated International Classification of Diseases, Ninth Revision, Clinical Modification (ICD-9-CM) diagnostic and procedure codes [29] and those with missing serum creatinine. Final cohort consisted of 50,318 patients.

## Outcomes

Main outcomes were postoperative AKI in the first 7 days after surgery and severe sepsis occurring at any time after surgery. We applied the Kidney Disease Improving Global Outcomes (KDIGO) definition for AKI using serum creatinine changes only without urine output criteria. KDIGO uses either 0.3 mg/dl increase within 48 hours or 50% increase above reference serum creatinine [30]. We followed the criteria of the Agency for Healthcare Research and Quality for the patient safety indicator “Postoperative Sepsis” while organ failure associated with sepsis was identified by adding ICD-9-CM codes for acute organ dysfunction [31, 32].

## Predictor variables

From the linked DECLARE dataset we used 285 demographic, socio-economic, administrative, clinical, pharmacy and laboratory variables to derive variables for the initial “Preoperative Features Dataset” (Fig 1 and Table 1). Patient comorbidity data was derived using up to 50 ICD-9-CM diagnostic codes recorded in the raw data for each patient. We used the method of Elixhauser et al. to calculate multiple binary comorbidity variables with the exception for chronic kidney disease for which we used updated definitions [29, 33]. Since some comorbidities had low prevalence in the study population (<2%), we included Charlson comorbidity index as a composite measure for medical comorbidities [34] in all multivariable analyses. We extracted medications dispensed on the first admission day using RxNorms data grouped into drug classes according to the US, Department of Veterans Affairs National Drug File-Reference Terminology [35]. For each patient we considered all potential predictors available in the preoperative setting and the final predictor subset for multivariate model was selected by including predictors with statistical significance ( $P < 0.2$ ) in univariate regression analysis (`R` function, `univariate_selection`).

## Sample Size

We included all patients that satisfied our inclusion criteria in the cohort. The reported results were calculated from validation cohort derived using a 70/30 cross validation procedure. We estimated that the validation cohort of 15,000 patients allows a maximum width of 95% confidence interval (CI) for area under the curve (AUC) of 0.02 when prevalence of postoperative complication is 5% and 0.02 when prevalence is 40%.

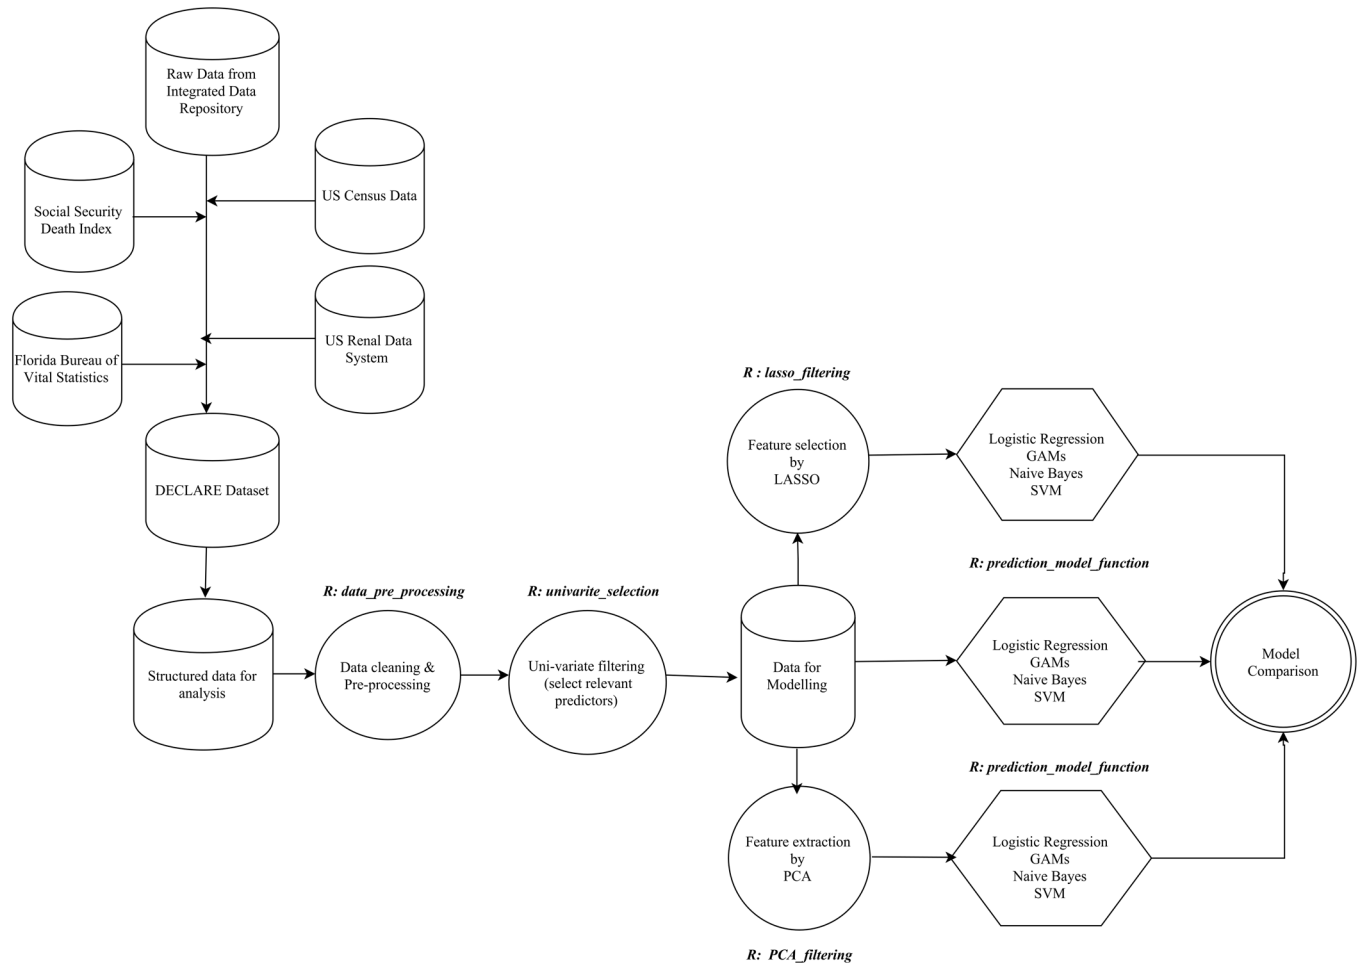

**Fig 1. Development flow from raw data to model building.** Sequence of steps from aggregation of raw data, data preparation and leading to model building. The R functions used at each stage is represented in bold italics. R functions are available in github repository: [https://github.com/PRISMUF/ML\\_Algorithm\\_Postoperative.git](https://github.com/PRISMUF/ML_Algorithm_Postoperative.git). GAM, generalized additive model; SVM, support vector machine; LASSO; least absolute shrinkage and selection operator; PCA, principal component analysis.

doi:10.1371/journal.pone.0155705.g001

## Predictive Analytics Process

Fig 1 outlines the experimental design of the predictive analytics process. Following data integration we performed data preparation steps to improve computational efficiency and robustness of prediction models. Data preprocessing included data cleaning with removal of outliers, imputation of missing data, and optimization of categorical and nominal variables (Table 1 and Fig 1) [36, 37]. To address the risk of overfitting, data was randomly split into 70% used for training the model and the 30% for validation for each run [38]. Proportion of AKI and severe sepsis were similar in each partition by the sampling design. The analytical and writing plan followed the TRIPOD recommendations [39].

## Data Cleaning

For all variables we developed set of automatic rules for the removal of outliers that were considered unreasonable observations by medical experts. For continuous variables, observations that fell in the top and bottom 1% of the distribution were considered as outliers. Identified outliers were removed and then treated as missing values. All missing observations were

**Table 1. Characteristics of input variables.**

| Variable                                    | Type of Variable | Data Source | Number of categories | Type of Preprocessing                                                                                               |
|---------------------------------------------|------------------|-------------|----------------------|---------------------------------------------------------------------------------------------------------------------|
| <b>Demographic variables</b>                |                  |             |                      |                                                                                                                     |
| Age (years)                                 | Continuous       | Derived     |                      | Imputation of outliers <sup>a</sup> ; Nonlinear function <sup>b</sup>                                               |
| Gender                                      | Binary           | Raw         | 2                    |                                                                                                                     |
| Race                                        | Nominal          | Raw         | 5                    | Optimization of categorical features <sup>c</sup>                                                                   |
| <b>Socioeconomic variables</b>              |                  |             |                      |                                                                                                                     |
| Primary Insurance                           | Nominal          | Raw         | 4                    | Optimization of categorical features <sup>c</sup>                                                                   |
| <b>Residency area characteristics</b>       |                  |             |                      |                                                                                                                     |
| Zip code                                    | Nominal          | Raw         | 10,000               | Transformation through link to Census data <sup>d</sup>                                                             |
| County                                      | Nominal          | Raw         | 71                   | Optimization of categorical features <sup>c</sup>                                                                   |
| Rural area                                  | Binary           | Derived     | 2                    |                                                                                                                     |
| Total Population                            | Continuous       | Derived     |                      | Obtained using residency zip code with linkage to US Census data <sup>d</sup> ; Imputation of outliers <sup>a</sup> |
| Median Income                               | Continuous       | Derived     |                      | Obtained using residency zip code with linkage to US Census data <sup>d</sup> ; Imputation of outliers <sup>a</sup> |
| Total Proportion of African-Americans       | Continuous       | Derived     |                      | Obtained using residency zip code with linkage to US Census data <sup>d</sup> ; Imputation of outliers <sup>a</sup> |
| Total Proportion of Hispanic                | Continuous       | Derived     |                      | Obtained using residency zip code with linkage to US Census data <sup>d</sup> ; Imputation of outliers <sup>a</sup> |
| Population Proportion Below Poverty         | Continuous       | Derived     |                      | Obtained using residency zip code with linkage to US Census data <sup>d</sup> ; Imputation of outliers <sup>a</sup> |
| Distance from Residency to Hospital (km)    | Continuous       | Derived     |                      | Calculated using residency zip code; Imputation of outliers <sup>a</sup>                                            |
| <b>Operative characteristics</b>            |                  |             |                      |                                                                                                                     |
| Day of admission                            | Nominal          | Derived     | 12                   | Optimization of categorical features <sup>c</sup>                                                                   |
| Month of admission                          | Nominal          | Derived     | 12                   | Optimization of categorical features <sup>c</sup>                                                                   |
| Weekend admission                           | Binary           | Derived     | 2                    |                                                                                                                     |
| Attending Surgeon                           | Nominal          | Raw         | 520                  | Optimization of categorical features <sup>c</sup>                                                                   |
| Admission Source                            | Nominal          | Raw         | 3                    | Optimization of categorical features <sup>c</sup>                                                                   |
| Admission Type                              | Binary           | Raw         | 2                    |                                                                                                                     |
| Admitting service type                      | Binary           | Derived     | 2                    |                                                                                                                     |
| Time of surgery from admission (days)       | Continuous       | Derived     |                      | Imputation of outliers <sup>b</sup>                                                                                 |
| Surgery Type                                | Nominal          | Derived     | 12                   | Optimization of categorical features <sup>c</sup>                                                                   |
| Primary surgical procedure                  | Nominal          | Derived     | 1555                 | Forest tree analysis of ICD-9-CM codes <sup>e</sup>                                                                 |
| <b>Comorbidities</b>                        |                  |             |                      |                                                                                                                     |
| Charlson's comorbidity index                | Nominal          | Derived     | 18                   | Optimization of categorical features <sup>c</sup>                                                                   |
| Major Diagnosis Category                    | Nominal          | Raw         | 28                   | Optimization of categorical features <sup>c</sup>                                                                   |
| Myocardial Infarction                       | Binary           | Derived     | 2                    |                                                                                                                     |
| Congestive Heart Failure                    | Binary           | Derived     | 2                    |                                                                                                                     |
| Peripheral Vascular Disease                 | Binary           | Derived     | 2                    |                                                                                                                     |
| Cerebrovascular Disease                     | Binary           | Derived     | 2                    |                                                                                                                     |
| Chronic Pulmonary Disease                   | Binary           | Derived     | 2                    |                                                                                                                     |
| Connective Tissue Disease-Rheumatic Disease | Binary           | Derived     | 2                    |                                                                                                                     |
| Diabetes                                    | Binary           | Derived     | 2                    |                                                                                                                     |
| Cancer                                      | Binary           | Derived     | 2                    |                                                                                                                     |
| Liver Disease                               | Binary           | Derived     | 2                    |                                                                                                                     |
| Chronic kidney disease stage                | Binary           | Derived     | 2                    |                                                                                                                     |

(Continued)

Table 1. (Continued)

| Variable                                                       | Type of Variable | Data Source                         | Number of categories | Type of Preprocessing                                                 |
|----------------------------------------------------------------|------------------|-------------------------------------|----------------------|-----------------------------------------------------------------------|
| <b>Medications</b>                                             |                  |                                     |                      |                                                                       |
| Indicator of receiving Aminoglycosides on admission day        | Binary           | Derived                             | 2                    |                                                                       |
| Indicator of receiving Bicarbonate on admission day            | Binary           | Derived                             | 2                    |                                                                       |
| Indicator of receiving Diuretics on admission day              | Binary           | Derived                             | 2                    |                                                                       |
| Indicator of receiving Steroid on admission day                | Binary           | Derived                             | 2                    |                                                                       |
| Indicator of receiving Vancomycin on admission day             | Binary           | Derived                             | 2                    |                                                                       |
| Indicator of receiving ACE Inhibitors on admission day         | Binary           | Derived                             | 2                    |                                                                       |
| Indicator of receiving NSAIDS on admission day                 | Binary           | Derived                             | 2                    |                                                                       |
| Indicator of receiving Aspirin on admission day                | Binary           | Derived                             | 2                    |                                                                       |
| Indicator of receiving Antiemetic on admission day             | Binary           | Derived                             | 2                    |                                                                       |
| Indicator of receiving Betablockers on admission day           | Binary           | Derived                             | 2                    |                                                                       |
| Indicator of receiving statin on admission day                 | Binary           | Derived                             | 2                    |                                                                       |
| Indicator of receiving naloxone on admission day               | Binary           | Derived                             | 2                    |                                                                       |
| Indicator of receiving pressors on admission day <sup>f</sup>  | Binary           | Derived                             | 2                    |                                                                       |
| Indicator of receiving inotropes on admission day <sup>f</sup> | Binary           | Derived                             | 2                    |                                                                       |
| <b>Preoperative laboratory results</b>                         |                  |                                     |                      |                                                                       |
| Reference serum creatinine                                     | Continuous       | Derived                             |                      | Imputation of outliers <sup>b</sup>                                   |
| Reference estimated glomerular filtration rate                 | Continuous       | Calculated from baseline creatinine |                      | Imputation of outliers <sup>b</sup> ; Nonlinear function <sup>b</sup> |
| MDRD creatinine                                                | Continuous       | Derived                             |                      | Imputation of outliers <sup>b</sup>                                   |
| Ratio of reference creatinine to MDRD Cr                       | Continuous       | Derived                             |                      | Imputation of outliers <sup>b</sup>                                   |
| Hematocrit                                                     | Continuous       | Raw                                 |                      | Imputation of outliers <sup>b</sup> ; Nonlinear function <sup>b</sup> |
| Hemoglobin, g/dl                                               | Continuous       | Raw                                 |                      | Imputation of outliers <sup>b</sup> ; Nonlinear function <sup>b</sup> |
| Urine protein, mg/dL                                           | Nominal          | Raw                                 | 4                    | Optimization of categorical features <sup>c</sup>                     |
| Urinal Hemoglobin, mg/dL                                       | Nominal          | Raw                                 | 5                    | Optimization of categorical features <sup>c</sup>                     |
| Urinal Glucose, mg/dL                                          | Nominal          | Raw                                 | 5                    | Optimization of categorical features <sup>c</sup>                     |
| No of complete blood count tests                               | Nominal          | Raw                                 | 4                    | Optimization of categorical features <sup>c</sup>                     |
| No of urine tests                                              | Nominal          | Derived                             | 4                    | Optimization of categorical features <sup>c</sup>                     |

<sup>a</sup> For continuous variables, observations that fell in the top and bottom 1% of the distribution were removed and imputed being considered as outliers.

<sup>b</sup> Nonlinear risk function was calculated for continuous functions entered to the model.

<sup>c</sup> For categorical variables with more than two levels, levels were transformed to a numeric value as detailed in Methods section.

<sup>d</sup> Using residency zip code, we linked to US Census data to calculate residing neighborhood characteristics and distance from hospital.

<sup>e</sup> Surgical procedure codes were optimized using forest tree analysis of ICD-9-CM codes as detailed in Methods section.

<sup>f</sup> Variable entered into model as "Indicator of receiving pressors or inotropes on admission day".

doi:10.1371/journal.pone.0155705.t001

imputed before model building using automated algorithm. For nominal variables with missing entries, a distinct “missing” category was created. For continuous variables, the mean value for a given variable was used for imputation.

## Optimization of Categorical Features

For nominal variables (such as surgeon’s ID) and categorical features with more than two levels (Table 1), the values in each level ( $x_i$ ) were replaced with the ratio:

$$\log[P(X_i = x_i|E = 1)/P(X_i = x_i|E = 0)],$$

where  $E = 1$  and  $E = 0$  represent a positive and negative outcome respectively as previously described (R function, `data_pre_processing`) [3]. The probability  $P(X_i = x|E = e)$  was estimated by  $\# \{j : E^j = e, x_i^j = x\} / \# \{j : E^j = e\}$  where,  $E^j$  represents outcome at level  $j$  of categorical variable  $x_i$  and  $\# \{j : E^j = e, x_i^j = x\}$  represents the number of cases with  $E^j = e$  and  $x_i^j = x$ . In case of classification trees such substitution gives the optimal splits, in terms of cross-entropy or Gini index. This transformation of categorical predictors into ordered variable provides better performance and a more robust model by reducing the chance of overfitting. However, when the number of unique values in a categorical variable is very large, the categorical predictor gets grouped into partitions of small size, and hence it will be difficult to obtain statistically significant results. A grouping scheme is used to obtain a reliable estimate of  $P(X_i = x|E = e)$ , such that risk factor categories with fewer than 100 records determined by sensitivity analysis were grouped together and labeled as “other”. This “other” group was further split into several subgroups where each subgroup contained categories with similar proportions of patients from different classes [3]. This was achieved by performing k-means clustering on the set of categories in the “other” group. We set the number of clusters to 5.

## Optimization of surgical procedure codes

The types of surgical procedures were determined using the 4-digit primary procedure ICD-9-CM codes. The existing ~ 3000 codes are prefix-based on anatomical location of surgery and often lack detailed descriptions of surgical approach. Although they are important features for risk stratification, their high dimensionality renders them challenging for the use in predictive models. In addition, while for some procedure codes only a few patients were encountered in the cohort, the estimation of probabilities by counting the number of such patients in each class would be unreliable. To overcome this issue we combined procedures with small number of patients into groups of procedures based on their similarity according to the ICD-9-CM classification using forest tree approach as previously described (R function, `data_pre_processing`) [3]. We created a tree where each node  $n$  corresponds to a certain group of the procedures and is described by a sequence of digits ( $S_n$ , length varies from 2 to 4); and each successor of a given node has a code generated by adding to  $S_n$  one additional digit from the right. For each leaf node, we assigned a number of patients who had a type of surgical procedure described by this node’s code, and for each non-leaf node (such nodes represent general classes of procedures) we assigned a number of patients whose type of surgical procedure belongs to this class. Procedures were aggregated up to the top level of the ICD-9-CM hierarchy (18 basic procedures classes) such that each procedure/group of procedures contained at least 100 patients. The value of this parameter was selected based on a grid search through the values 50, 100, 150, 250 and 500. We enumerated the obtained set of procedures or groups of procedures and the enumeration index was taken as a discrete feature in our model. The grouping method reduced the number of levels in procedures from 1,536 to 187 and improved the proportion of low frequency procedures.



## Predictive Models

We compared four predictive modeling approaches: Naïve Bayes, generalized additive model (GAM), logistic regression, and support vector machine (SVM) (R function, prediction\_model\_function). We choose Naive Bayes as the commonly used type of generative models, a category of predictive models that learns the distribution of the input data, and by using this joint probability predicts the outcome using the Bayes rule [40]. More commonly used category of discriminative models learn a direct map from the input data to the response labels and was represented by logistic regression and GAM [40]. Logistic regression is a commonly used method in medical literature and the predicted risk is either monotonically increasing or decreasing. On the other hand, GAM are additive regression models that can relax the monotonicity assumption of logistic models and offer advantage of estimating non-linear risk functions for continuous variables. We used GAM to estimate non-linear functions for age, reference estimated glomerular filtration rate, hematocrit, and hemoglobin. Support vector machine is one of the widely used advanced machine learning techniques [41].

## Generalized Additive Model

We estimated the probability of outcome ( $E = 1$ , otherwise  $E = 0$ ) by using a generalized additive model:

$$\text{logit } P(E = 1 | X = x) = \alpha + \sum_{i=1}^m f_i(x_i), \tag{1}$$

where  $m$  is the number of risk factors,  $X = (X_1, \dots, X_m)$  are the risk factors,  $x = (x_1, \dots, x_m)$  are the values of these factors,  $f_i$  is a nonlinear risk function associated with the  $i$ th risk factor and  $\alpha$  is a free term. Nonlinear risk functions  $f_i$  were estimated for each feature with cubic splines via a local scoring algorithm [42]. The degrees of freedom for each spline were estimated by maximizing restricted likelihood function [43]. Degrees of freedom characterize a curvature of a spline, with value 1 corresponding to a linear function. Risk predictors with estimated degrees of freedom close to 1 were not smoothed in the final model; instead the original values of risk predictors  $x_i$  were used. Therefore, the final model has the following form as in Eq 2 where  $\bar{I}$  is a set of risk predictors with estimated degrees of freedom close to 1 and  $w_i$  is the linear weight of the  $i$ th risk predictors.

$$\text{logit } P(E = 1 | X = x) = \alpha + \sum_{i \in \bar{I}} w_i * x_i + \sum_{i \in I} f_i(x_i) \tag{2}$$

## Logistic Regression

Assuming a linear association between the predictor variables and the logit of each outcome (logarithm of the odds of positive outcome), we applied logistic regression algorithm that uses a weighted least squares algorithm to construct a regression line as the best fit through the data points by minimizing the weighted sum of squared distances to the fitted regression line [21]. Logistic regression model for independent predictors from set  $I$  is defined as Eq 1, where  $P(E = 1 | X)$  is the probability of predicting a positive outcome given  $X$  and  $\beta_i$  are the coefficients estimated from data.

$$P(E = 1 | X) = \frac{1}{1 + e^{-(\beta_0 + \sum_{i \in I} \beta_i * x_i)}} \tag{3}$$



## Naïve Bayes Model

Naïve Bayes is a probabilistic classifier, based on applying Bayes' theorem, and assumes that given the class of the outcome vector, the covariates are independent. The probability of event  $P(E = 1|X = x)$  is estimated from  $P(E = 1) * \prod_{i=1}^m P(X = x_i|E = 1)$ . Even though this assumption is not generally true, it simplifies the model complexity and is often seen to outperform other sophisticated alternatives [44].

## Support Vector Machine

SVM is a discriminative model that performs classification by finding a separating decision boundary called "hyperplane" in the input feature space [45–47]. If no linear separation is possible, the SVM algorithm can map the input feature space to a higher dimension using kernel functions and then can construct an optimal separating hyperplane. Consider a binary classification problem with predictors  $\in\{1,-1\}$  and a hyperplane  $w \cdot x - b = 0$ . A simple SVM model can be represented as minimizing  $\|w\|$  subject to  $w \cdot x_i - b \geq 1$  for class 1 and  $w \cdot x_i - b \leq -1$  for class -1. SVM has excellent generalization performance, however compared to the other basic regression techniques the computational cost of training the SVM model is higher and it can be as high as  $O(n^3)$  especially for kernel SVMs.

## Performance Enhancement through Data Reduction Techniques

To overcome the high dimensionality of our dataset we tested two data reduction techniques focused on reducing the size of data. For the first approach, we used the Least Absolute Shrinkage and Selection Operator (LASSO) technique (R function, `lasso_filtering` [48]) as a feature selection technique to select the best subset of features from the initial dataset. For the second approach, we performed feature extraction with Principal Component Analysis (PCA) technique (R function `PCA_filtering`), which creates a set of meta-features that are linear combination of the original feature set with first component capturing the largest variance, the second principal component exhibiting the second largest variance, and so on. To avoid overfitting, only the top five principal components were considered for model building and all the principal components were uncorrelated. The compressed data can help in speeding up the algorithms (used for prediction models), and in removing redundancy in data, and thereby improving the model performance.

## Internal Validation

The results were reported based on a 70/30 cross validation procedure where the data were randomly split into 70% used for training the model and the 30% for validation. The process was repeated 50 times to report performance measures and relevant confidence intervals.

## Model Performance

We assessed each model's discrimination using the area under the AUC and model accuracy by determining the fraction of correct classification and positive predicted value for each model. We used bootstrap sampling to obtain 95% confidence intervals for these statistics, and comparisons were made using nonparametric methods. Model calibration was tested using Hosmer-Lemeshow statistic.

## Results

### Participants

Among 50,318 adult patients who underwent major inpatient surgery, 36% ( $n = 18246$ ) developed AKI in the first seven postoperative days. The severe sepsis occurred among 5% ( $n = 2589$ ) of the cohort ([Table 2](#)). The distribution of outcomes and preoperative clinical characteristics did not differ between training and validation cohorts.

### Model specification

The data preprocessing significantly improved computational efficiency as measured by the time required for model building for all types of models ([Table 3](#)). Both logistic regression and GAM demonstrated the largest improvement as the computational time was reduced by one hundredth in the pre-processing step. As expected the independence assumption of the Naïve Bayes model undermined the effect of our grouping scheme for data pre-processing thus gain in computational efficiency was not as large. The inherent computational intensity of the SVM model prevented this comparison as SVM algorithm took on average 2 to 3 hours for one simulation.

### Model performance

[Table 4](#) compares the predictive performance of different modeling approaches. Both GAM and logistic regression had improved performance and model fit compared to Naïve Bayes model with all AUCs above 0.80 and between 0.022 and 0.03 higher for predicting AKI and severe sepsis, respectively. Although discriminative performance of GAM was not significantly higher than logistic regression, they were able to account for the non-linearity of continuous clinical variables. Risk patterns for the plasma hematocrit, hemoglobin and estimated glomerular filtration rate showed clearly how non-linear models can effectively depict the risk variation compared to linear models ([Fig 2](#)).

[Table 4](#) details the performance enhancement achieved using data reduction techniques. Using LASSO to reduce the input feature space had minimal effect on prediction performance, while data reduction using principal component analysis improved the models predictive power. Models built using the first 5 principal components provided a 3–6% enhancement in AUC, 2–3% improvement in accuracy and 7–10% improvement in positive predictive values for GAM and similar trend was observed for logistic regression model, SVM and Naïve Bayes model. After application of principal component analysis the predictive performance of GAM and SVM models was comparable.

## Discussion

Our study demonstrates that application of data preprocessing, choice of predictive modeling approach and dimensionality reduction techniques affect the risk prediction performance for two major postoperative complications using routinely available data in electronic health records. Data processing techniques had a positive impact on computational efficiency, and data reduction techniques improved the model predictive capability. Model comparison revealed GAM and SVM as the best options for building risk prediction models among four approaches we used since they provided high discrimination while accounting for the non-linearity of continuous clinical variables.

We developed models that could be applied at point of access to preoperative care, do not rely on self-reported data and specialized testing and were derived from whole population data that are routinely collected in preoperative period. Our data set included readily available

**Table 2. Summary of overall cohort.** Abbreviations. GFR, Glomerular filtration rate, CBC, complete blood count.

|                                                              | <b>Overall (N = 50318)</b> |
|--------------------------------------------------------------|----------------------------|
| <b>Demographic features</b>                                  |                            |
| Age, median (25th-75 <sup>th</sup> )                         | 56 (43, 68)                |
| Female Gender, n (%)                                         | 24670 (49.0)               |
| Race, n (%)                                                  |                            |
| White                                                        | 40515 (82.2)               |
| African-American                                             | 6183 (12.5)                |
| Hispanic                                                     | 1534 (3.1)                 |
| Other                                                        | 1064 (2.2)                 |
| Primary Insurance Group, n (%)                               |                            |
| Medicare                                                     | 19469 (38.7)               |
| Medicaid                                                     | 6518 (13.0)                |
| Private                                                      | 20592 (40.9)               |
| Uninsured                                                    | 3736 (7.4)                 |
| <b>Socio-economic features</b>                               |                            |
| Neighborhood characteristics                                 |                            |
| Rural area, n (%)                                            | 16098 (32.1)               |
| Total Population, median (25th-75th)                         | 17085 (10002, 27782)       |
| Median Income, median (25th-75th)                            | 33293 (28451, 40309)       |
| Total Proportion of African-Americans, median (25th-75th)    | 0.10 (0.04, 0.20)          |
| Total Proportion of Hispanic, median (25th-75th)             | 0.04 (0.02, 0.06)          |
| Population Proportion Below Poverty, median (25th-75th)      | 0.13 (0.09, 0.19)          |
| Distance from Residency to Hospital (km), median (25th-75th) | 53(26, 118)                |
| County (top 3 categories), n (%)                             |                            |
| Alachua                                                      | 8667 (17.2)                |
| Marion                                                       | 4807 (9.6)                 |
| Lake                                                         | 2155 (4.3)                 |
| <b>Comorbidity features</b>                                  |                            |
| Charlson's comorbidity index (CCI), median (25th-75th)       | 1 (0, 2)                   |
| Cancer, n (%)                                                | 10121 (20.1)               |
| Diabetes, n (%)                                              | 8332 (16.6)                |
| Chronic Pulmonary Disease, n (%)                             | 8179 (16.3)                |
| Peripheral Vascular Disease, n (%)                           | 5953 (11.8)                |
| Cerebrovascular Disease, n (%)                               | 4175 (8.3)                 |
| Congestive Heart Failure, n (%)                              | 3946 (7.8)                 |
| Myocardial Infarction, n (%)                                 | 3290 (6.5)                 |
| Liver Disease, n (%)                                         | 2482 (4.9)                 |
| Number of diagnoses, median (25th-75th)                      | 8 (5, 13)                  |
| Major Diagnosis Category (top 3 categories), n (%)           |                            |
| Musculoskeletal System and Connective Tissue                 | 9924 (19.7)                |
| Circulatory System                                           | 7507 (14.9)                |
| Nervous System                                               | 6675 (13.3)                |
| <b>Operative features</b>                                    |                            |
| <b>Admission</b>                                             |                            |
| Weekend admission, n (%)                                     | 6895 (13.7)                |
| Admission day (top 3 categories), n (%)                      |                            |
| Tuesday                                                      | 10174 (19.8)               |

(Continued)

Table 2. (Continued)

|                                                                           | Overall (N = 50318) |
|---------------------------------------------------------------------------|---------------------|
| Wednesday                                                                 | 9065 (17.6)         |
| Monday                                                                    | 8843 (17.2)         |
| Admission month (top 3 categories), n (%)                                 |                     |
| March                                                                     | 4549 (9.0)          |
| October                                                                   | 4471 (8.9)          |
| January                                                                   | 4449 (8)            |
| Number of operating surgeons, n                                           | 520                 |
| Number of procedures per operating surgeon, n (%)                         |                     |
| First rank                                                                | 1905 (3.8)          |
| Second rank                                                               | 1602 (3.2)          |
| Third rank                                                                | 1532 (3.0)          |
| Admission Source, n(%)                                                    |                     |
| Emergency room                                                            | 13066 (26.4)        |
| Outpatient setting                                                        | 29826 (60.1)        |
| Transfer                                                                  | 6699 (13.5)         |
| Emergent surgery status, n (%)                                            | 22820 (45.4)        |
| Admission to Surgical service, n (%)                                      | 44652 (88.7)        |
| Time of surgery from admission (days), n (%)                              |                     |
| 0                                                                         | 28613 (56.9)        |
| 1–2                                                                       | 11397 (22.6)        |
| > = 3                                                                     | 10308 (20.5)        |
| Surgery Type, n (%)                                                       |                     |
| Neurologic Surgery                                                        | 8385 (16.7)         |
| Orthopedic Surgery                                                        | 7472 (14.9)         |
| Cardiothoracic Surgery                                                    | 6755 (13.5)         |
| Trauma/Burn Surgery                                                       | 5650 (11.2)         |
| General Gastrointestinal Surgery                                          | 4120 (8.2)          |
| Transplant Surgery                                                        | 2765 (5.5)          |
| Urological Surgery                                                        | 2640 (5.3)          |
| vVascular Surgery                                                         | 2601 (5.2)          |
| Gynecologic Surgery                                                       | 2437 (4.8)          |
| General Oncology Surgery                                                  | 2188 (4.4)          |
| General Colorectal Surgery                                                | 1833 (3.6)          |
| Other Surgeries <sup>a</sup>                                              | 3472 (6.9)          |
| Surgery procedure type                                                    |                     |
| Primary Procedure codes, n                                                | 1555                |
| Primary Procedure (top 3 categories), n (%)                               |                     |
| 01.59 Other excision or destruction of lesion or tissue of brain          | 1330 (2.6)          |
| 81.54 Total knee replacement                                              | 1223 (2.4)          |
| 39.51 Clipping of aneurysm                                                | 1099 (2.2)          |
| <b>Preoperative and admission day laboratory results</b>                  |                     |
| Reference creatinine (mg/dl), median (25th-75th)                          | 0.8 (0.7, 1.03)     |
| Estimated reference GFR (mL/min/1.73 m <sup>2</sup> ), median (25th-75th) | 92.3 (71.1, 107.9)  |
| Hemoglobin, g/dL median (25th-75th)                                       | 11.7 (10.2, 13.2)   |
| Hematocrit, median (25th-75th)                                            | 34.3 (30.1, 38.6)   |
| Dipstik urine protein, mg/dL n (%)                                        |                     |
| Missing                                                                   | 41948 (83.4)        |

(Continued)

Table 2. (Continued)

|                                                     | Overall (N = 50318) |
|-----------------------------------------------------|---------------------|
| Negative                                            | 5502 (10.9)         |
| 30                                                  | 1756 (3.5)          |
| 100                                                 | 753 (1.5)           |
| > = 300                                             | 359 (0.7)           |
| Number of CBC tests, n (%)                          |                     |
| 0                                                   | 14620 (29.1)        |
| 1                                                   | 27554 (54.8)        |
| 2                                                   | 5912 (11.8)         |
| 3 or more                                           | 2232 (4.4)          |
| <b>Admission day medications</b>                    |                     |
| Admission medication types, n                       | 40                  |
| Admission Day Medications (top 3 categories), n (%) |                     |
| Antiemetic drugs                                    | 28783 (57.2)        |
| Beta blockers                                       | 11750 (23.4)        |
| Diuretics                                           | 5886 (11.7)         |
| Statin                                              | 5790 (11.5)         |
| Angiotensin-Converting-Enzyme Inhibitors            | 5066 (10.1)         |
| Aspirin                                             | 3428 (6.8)          |
| Pressors/Inotropes                                  | 2864 (5.7)          |
| Bicarbonate                                         | 2070 (4.1)          |
| Naloxone                                            | 575 (1.1)           |
| <b>Outcomes</b>                                     |                     |
| KDIGO-AKI                                           | 18246 (36%)         |
| Severe sepsis                                       | 2589 (5%)           |

<sup>a</sup> Other surgeries include ear-nose-throat, ophthalmology, and plastic surgeries.

doi:10.1371/journal.pone.0155705.t002

variables in electronic health records, many of which are complex variables with multiple values such as residency ZIP codes, procedure and diagnostic codes and surgeon’s identities. Inclusion of these non-traditional variables in the model allowed us to capture certain aspects of health discriminators such as socio-economic status or effect of individual surgeon’s performance. The importance of ZIP code as a surrogate of neighborhood socio-economic characteristics has been recently brought to light by studies demonstrating its powerful association with

Table 3. Comparison of time required for model building in seconds.

| Model                       | Acute Kidney Injury                           |                                          | Severe Sepsis                             |                                          |
|-----------------------------|-----------------------------------------------|------------------------------------------|-------------------------------------------|------------------------------------------|
|                             | Time required for model building (in seconds) |                                          |                                           |                                          |
|                             | Before data preprocessing or optimization     | After data preprocessing or optimization | Before data preprocessing or optimization | After data preprocessing or optimization |
| Logistic Regression Model   | 4640 s                                        | 7 s                                      | 5530 s                                    | 8 s                                      |
| Generalized Additive Models | 6520 s                                        | 48 s                                     | 6980 s                                    | 73 s                                     |
| Naïve Bayes Model           | 26 s                                          | 22 s                                     | 19 s                                      | 24 s                                     |

doi:10.1371/journal.pone.0155705.t003

**Table 4. Comparison of model performances.** Abbreviations. AUC, area under the receiver operating characteristics curve; CI, confidence interval; GAM, generalized additive model; SVM, support vector machine; LASSO; least absolute shrinkage and selection operator; PPV, positive predicted value. Bootstrap sampling was used to obtain 95% confidence intervals and comparisons were made using nonparametric methods.

| Model                                                       | Acute Kidney Injury    |                                       |                        | Severe Sepsis          |                                       |                        |
|-------------------------------------------------------------|------------------------|---------------------------------------|------------------------|------------------------|---------------------------------------|------------------------|
|                                                             | Accuracy (95% CI)      | AUC (95% CI)                          | PPV (95% CI)           | Accuracy (95% CI)      | AUC (95% CI)                          | PPV (95% CI)           |
| <b>Logistic Regression Model</b>                            | 0.752<br>(0.746,0.758) | 0.824<br>(0.818,0.828) <sup>b</sup>   | 0.725<br>(0.714,0.737) | 0.773<br>(0.762,0.781) | 0.851<br>(0.840,0.8560)               | 0.811<br>(0.785,0.833) |
| <b>GAMs</b>                                                 | 0.756<br>(0.751,0.761) | 0.827<br>(0.821,0.832) <sup>a</sup>   | 0.719<br>(0.706,0.729) | 0.775<br>(0.766,0.783) | 0.852 (0.840,0.863)                   | 0.806<br>(0.779,0.832) |
| <b>Naïve Bayes Model</b>                                    | 0.744<br>(0.738,0.749) | 0.797<br>(0.791,0.803) <sup>a,b</sup> | 0.545<br>(0.534,0.558) | 0.805<br>(0.798,0.811) | 0.83<br>(0.819,0.841) <sup>a,b</sup>  | 0.689<br>(0.659,0.716) |
| <b>SVM</b>                                                  | 0.767<br>(0.757,0.774) | 0.819<br>(0.811,0.828) <sup>a,b</sup> | 0.662<br>(0.648,0.676) | 0.71<br>(0.689,0.731)  | 0.762<br>(0.733,0.782) <sup>a,b</sup> | 0.677<br>(0.619,0.722) |
| <b>After feature selection with LASSO</b>                   |                        |                                       |                        |                        |                                       |                        |
| <b>Logistic Regression Model</b>                            | 0.753<br>(0.747,0.757) | 0.824<br>(0.818,0.830) <sup>b</sup>   | 0.726<br>(0.714,0.738) | 0.772<br>(0.760,0.780) | 0.85 (0.838,0.863) <sup>b</sup>       | 0.812<br>(0.781,0.838) |
| <b>GAMs</b>                                                 | 0.757<br>(0.752,0.762) | 0.828<br>(0.822,0.833) <sup>a</sup>   | 0.72<br>(0.706,0.732)  | 0.774<br>(0.766,0.780) | 0.851 (0.842,0.862)                   | 0.806<br>(0.783,0.831) |
| <b>Naïve Bayes Model</b>                                    | 0.744<br>(0.737,0.750) | 0.797<br>(0.789,0.804) <sup>a,b</sup> | 0.545<br>(0.533,0.556) | 0.806<br>(0.800,0.813) | 0.831<br>(0.817,0.841) <sup>a,b</sup> | 0.69<br>(0.659,0.711)  |
| <b>SVM</b>                                                  | 0.767<br>(0.759,0.774) | 0.82<br>(0.812,0.829) <sup>a,b</sup>  | 0.665<br>(0.646,0.685) | 0.697<br>(0.684,0.713) | 0.757<br>(0.736,0.779) <sup>a,b</sup> | 0.689<br>(0.652,0.732) |
| <b>After feature extraction with 5 principal components</b> |                        |                                       |                        |                        |                                       |                        |
| <b>Logistic Regression Model</b>                            | 0.774<br>(0.769,0.781) | 0.853<br>(0.849,0.859) <sup>a,b</sup> | 0.758<br>(0.746,0.767) | 0.818<br>(0.809,0.824) | 0.904<br>(0.895,0.913) <sup>a,b</sup> | 0.854<br>(0.841,0.880) |
| <b>GAMs</b>                                                 | 0.773<br>(0.768,0.777) | 0.858<br>(0.853,0.862) <sup>a,b</sup> | 0.784<br>(0.771,0.793) | 0.826<br>(0.819,0.833) | 0.909<br>(0.902,0.917) <sup>a,b</sup> | 0.86<br>(0.843,0.878)  |
| <b>Naïve Bayes Model</b>                                    | 0.741<br>(0.735,0.747) | 0.819<br>(0.814,0.826) <sup>a,b</sup> | 0.666<br>(0.651,0.677) | 0.805<br>(0.797,0.815) | 0.882<br>(0.874,0.890) <sup>a,b</sup> | 0.839<br>(0.822,0.866) |
| <b>SVM</b>                                                  | 0.777<br>(0.767,0.782) | 0.857<br>(0.850,0.862) <sup>a,b</sup> | 0.735<br>(0.725,0.750) | 0.85<br>(0.737,0.897)  | 0.877<br>(0.828,0.904) <sup>a,b</sup> | 0.751<br>(0.667,0.850) |

<sup>a</sup> p<0.05 for AUC comparison with respect to logistic regression model without any data reduction.

<sup>b</sup> p<0.05 for AUC comparison with respect to GAMs model without any data reduction.

doi:10.1371/journal.pone.0155705.t004

multiple disease and health behaviors, including obesity, smoking, depression, heart disease and cancer [49–54]. The effect of the performance of surgeon or anesthesiologist is increasingly recognized as an important predictive factor of postoperative outcomes yet it remains controversial and is not routinely incorporated in publicly available risk calculators [55–57].

The data cleaning step is focused on improving the quality of data to make them “fit for use” by users, through reducing errors in the data by removing noise and outliers and improving their documentation and presentation [58]. Since data error rate of 1–5% can be expected, detailed and methodological processing of raw data is a crucial step before performing any analysis to reduce the influence of Type I and Type II errors. The improvement in computational efficiency that was achieved in our study with data cleaning and preprocessing, emphasizes the need for appropriate techniques to process data on a case-by-case basis. Designing data preparatory steps should be based on a good understanding of the nature of data and the clinical needs. In this study we developed a data processing methodology based on the distribution of each variable and its clinical background and relevance. Further, the robustness and smaller error margin of performance measures for all the models in our study can be partly credited to the efficient data preparatory steps.

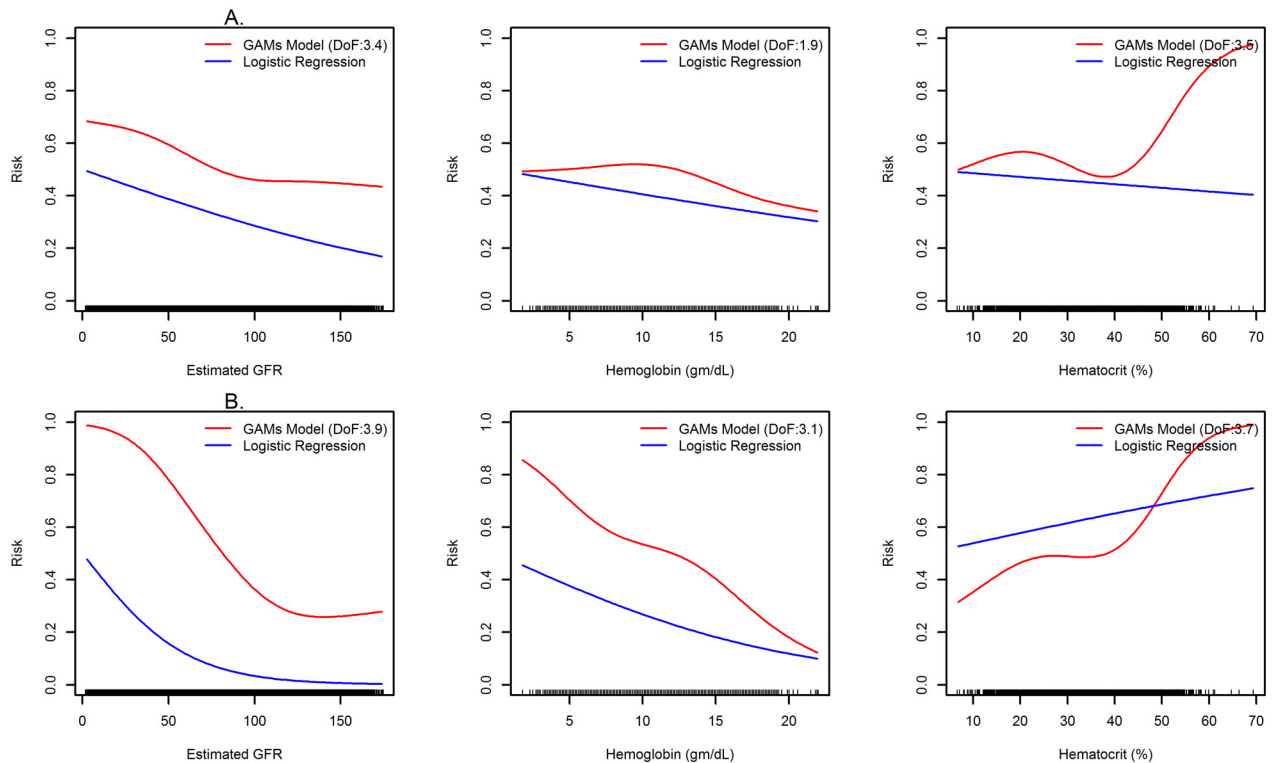

**Fig 2. Predicted risk functions for the association between (A) acute kidney injury and (B) severe sepsis and continuous variables.** Risk functions were generated from multivariate generalized additive models and logistic regression models. GAM, generalized additive model; DoF, degree of freedom; GFR, glomerular filtration rate.

doi:10.1371/journal.pone.0155705.g002

Even though we did not observe statistically significant difference among model performances, GAM was the preferred model in this study due to its accuracy, relative efficiency compared to SVM and ability to account for non-linearity of variables. GAM is a data driven prediction model that has the flexibility to capture non-monotonicity in the predicted risk and this could be a contributing factor for GAM to gain better results compared to the other prediction models. GAM as a non-linear additive algorithm has generated better fit in comparison to the other prediction models. Since parameter tuning is critical for SVM further fine tuning of SVM parameters may potentially improve the current results. Comparison of model performance with respect to various prediction models shows a performance saturation trend. Our results confirm previous findings that data reduction techniques may improve model performance with principal component analysis providing the best results for our models [59].

With the availability of electronic health records the increasing use of prediction models utilizing these data can be expected. Such models can be a useful guide for healthcare experts to identify patients who may benefit the most from interventions that can mitigate such risks. For patients, these models may provide tools to facilitate informed decision about surgical procedures and risk of complications. To be useful for these purposes, a prediction model must provide validated, robust and accurate estimates. All the prediction models compared in this study provided satisfactory performance in accuracy of the individual risk prediction that will require further external and prospective validation.



## Conclusions

Using predictive analytics and machine learning approaches we have built robust predictive models forecasting risk of two major postoperative complications. Generalized additive models and support vector machines showed superior performance compared to the other models selected for this study. These models could be applied at point of access to preoperative care, do not rely on self-reported data and specialized testing and were derived from whole population data that are routinely collected in preoperative period. We provide set of data preparatory steps to ensure performance and computational efficiency. Choice of predictive function and dimensionality reduction techniques are important to optimize the performance of risk models and further comparison of different machine learning approaches is warranted. In our analysis, feature extraction using principal component analysis improved the predictive performance of all models. External prospective validation of these models is necessary prior to implementation in real-time clinical workflow for automated and simplified risk stratification in preoperative period.

## Acknowledgments

Paul Thottakkara and Tezcan Ozrazgat-Baslanti contributed equally to the manuscript.

We provided access to R functions created at [https://github.com/PRISMUF/ML\\_Algorithm\\_Postoperative.git](https://github.com/PRISMUF/ML_Algorithm_Postoperative.git)

## Author Contributions

Analyzed the data: PT BBH TOB. Wrote the paper: PT TOB BBH PR PP PM AB. Conception or design of the study: AB TOB PR PT. Acquisition of data: AB TOB. Interpretation of results: PT TOB BBH PR PP PM AB. Writing and revision for important intellectual content: PT TOB BBH PR PP PM AB.

## References

1. Khan NA, Quan H, Bugar JM, Lemaire JB, Brant R, Ghali WA. Association of postoperative complications with hospital costs and length of stay in a tertiary care center. *J Gen Intern Med*. 2006; 21(2):177–80. Epub 2006/04/12. JG1319 [pii] doi: [10.1111/j.1525-1497.2006.00319.x](https://doi.org/10.1111/j.1525-1497.2006.00319.x) PMID: [16606377](https://pubmed.ncbi.nlm.nih.gov/16606377/)
2. Hobson C, Ozrazgat-Baslanti T, Kuxhausen A, Thottakkara P, Efron PA, Moore FA, et al. Cost and Mortality Associated With Postoperative Acute Kidney Injury. *Ann Surg*. 2014. Epub 2014/06/03. doi: [10.1097/SLA.0000000000000732](https://doi.org/10.1097/SLA.0000000000000732)
3. Korenkevych D, Ozrazgat-Baslanti T, Thottakkara P, Hobson CE, Pardalos P, Momcilovic P, et al. The Pattern of Longitudinal Change in Serum Creatinine and 90-Day Mortality After Major Surgery. *Ann Surg*. 2015. doi: [10.1097/SLA.0000000000001362](https://doi.org/10.1097/SLA.0000000000001362)
4. Bihorac A, Brennan M, Ozrazgat-Baslanti T, Bozorgmehri S, Efron PA, Moore FA, et al. National surgical quality improvement program underestimates the risk associated with mild and moderate postoperative acute kidney injury. *Crit Care Med*. 2013; 41(11):2570–83. doi: [10.1097/CCM.0b013e31829860fc](https://doi.org/10.1097/CCM.0b013e31829860fc) PMID: [23928835](https://pubmed.ncbi.nlm.nih.gov/23928835/)
5. Bihorac A, Yavas S, Subbiah S, Hobson CE, Schold JD, Gabrielli A, et al. Long-term risk of mortality and acute kidney injury during hospitalization after major surgery. *Ann Surg*. 2009; 249(5):851–8. doi: [10.1097/SLA.0b013e3181a40a0b](https://doi.org/10.1097/SLA.0b013e3181a40a0b) PMID: [19387314](https://pubmed.ncbi.nlm.nih.gov/19387314/)
6. Huber M, Ozrazgat-Baslanti T, Thottakkara P, Efron PA, Feezor R, Hobson C, et al. Mortality and Cost of Acute and Chronic Kidney Disease after Vascular Surgery. *Annals of vascular surgery*. 2015. doi: [10.1016/j.avsg.2015.04.092](https://doi.org/10.1016/j.avsg.2015.04.092)
7. Ozrazgat-Baslanti T, Thottakkara P, Huber M, Berg K, Gravenstein N, Tighe P, et al. Acute and chronic kidney disease and cardiovascular mortality after major surgery. *Annals of Surgery*. 2015.
8. Zarjou A, Agarwal A. Sepsis and acute kidney injury. *J Am Soc Nephrol*. 2011; 22(6):999–1006. Epub 2011/05/14. doi: [10.1681/ASN.2010050484](https://doi.org/10.1681/ASN.2010050484) ASN.2010050484 [pii]. PMID: [21566052](https://pubmed.ncbi.nlm.nih.gov/21566052/)
9. Copeland GP, Jones D, Walters M. POSSUM: a scoring system for surgical audit. *Br J Surg*. 1991; 78(3):355–60. Epub 1991/03/01. PMID: [2021856](https://pubmed.ncbi.nlm.nih.gov/2021856/)

10. Lake AP, Williams EG. ASA classification and perioperative variables: graded anaesthesia score? *Br J Anaesth*. 1997; 78(2):228–9. Epub 1997/02/01.
11. Hobson CE, Singhanian G, Bihorac A. Acute kidney injury in the surgical patient. *Crit Care Clin*. 2015.
12. Huen SC, Parikh CR. Predicting acute kidney injury after cardiac surgery: a systematic review. *Ann Thorac Surg*. 2012; 93(1):337–47. S0003-4975(11)02155-2 [pii] doi: [10.1016/j.athoracsur.2011.09.010](https://doi.org/10.1016/j.athoracsur.2011.09.010) PMID: [22186469](https://pubmed.ncbi.nlm.nih.gov/22186469/)
13. Miyagawa T, Nishida N, Ohashi J, Kimura R, Fujimoto A, Kawashima M, et al. Appropriate data cleaning methods for genome-wide association study. *J Hum Genet*. 2008; 53(10):886–93. Epub 2008/08/13. doi: [10.1007/s10038-008-0322-y](https://doi.org/10.1007/s10038-008-0322-y) PMID: [18695938](https://pubmed.ncbi.nlm.nih.gov/18695938/)
14. Osborne JW. Is data cleaning and the testing of assumptions relevant in the 21st century? *Front Psychol*. 2013; 4:370. Epub 2013/06/28. doi: [10.3389/fpsyg.2013.00370](https://doi.org/10.3389/fpsyg.2013.00370) PMID: [23805118](https://pubmed.ncbi.nlm.nih.gov/23805118/)
15. Van den Broeck J, Cunningham SA, Eeckels R, Herbst K. Data cleaning: detecting, diagnosing, and editing data abnormalities. *PLoS Med*. 2005; 2(10):e267. Epub 2005/09/06. 04-PLME-PF-0256 [pii] doi: [10.1371/journal.pmed.0020267](https://doi.org/10.1371/journal.pmed.0020267) PMID: [16138788](https://pubmed.ncbi.nlm.nih.gov/16138788/)
16. Chun FK, Karakiewicz PI, Briganti A, Walz J, Kattan MW, Huland H, et al. A critical appraisal of logistic regression-based nomograms, artificial neural networks, classification and regression-tree models, look-up tables and risk-group stratification models for prostate cancer. *BJU Int*. 2007; 99(4):794–800. Epub 2007/03/24. BJU6694 [pii] doi: [10.1111/j.1464-410X.2006.06694.x](https://doi.org/10.1111/j.1464-410X.2006.06694.x) PMID: [17378842](https://pubmed.ncbi.nlm.nih.gov/17378842/)
17. Faradmal J, Soltanian AR, Roshanaei G, Khodabakhshi R, Kasaeian A. Comparison of the performance of log-logistic regression and artificial neural networks for predicting breast cancer relapse. *Asian Pac J Cancer Prev*. 2014; 15(14):5883–8. Epub 2014/08/02. PMID: [25081718](https://pubmed.ncbi.nlm.nih.gov/25081718/)
18. Han SR, Guikema SD, Quiring SM. Improving the predictive accuracy of hurricane power outage forecasts using generalized additive models. *Risk Anal*. 2009; 29(10):1443–53. Epub 2009/08/13. doi: [10.1111/j.1539-6924.2009.01280.x](https://doi.org/10.1111/j.1539-6924.2009.01280.x) RISK1280 [pii]. PMID: [19671101](https://pubmed.ncbi.nlm.nih.gov/19671101/)
19. Heydari ST, Ayatollahi SM, Zare N. Comparison of artificial neural networks with logistic regression for detection of obesity. *J Med Syst*. 2012; 36(4):2449–54. Epub 2011/05/11. doi: [10.1007/s10916-011-9711-4](https://doi.org/10.1007/s10916-011-9711-4) PMID: [21556898](https://pubmed.ncbi.nlm.nih.gov/21556898/)
20. Huang HH, Xu T, Yang J. Comparing logistic regression, support vector machines, and permanental classification methods in predicting hypertension. *BMC Proc*. 2014; 8(Suppl 1):S96. Epub 2014/12/19. doi: [10.1186/1753-6561-8-S1-S96](https://doi.org/10.1186/1753-6561-8-S1-S96) 1753-6561-8-S1-S96 [pii]. PMID: [25519351](https://pubmed.ncbi.nlm.nih.gov/25519351/)
21. Kurt I, Ture M, Kurum AT. Comparing performances of logistic regression, classification and regression tree, and neural networks for predicting coronary artery disease. *Expert Syst Appl*. 2008; 34(1):366–74. doi: [10.1016/j.eswa.2006.09.004](https://doi.org/10.1016/j.eswa.2006.09.004)
22. Maroco J, Silva D, Rodrigues A, Guerreiro M, Santana I, de Mendonca A. Data mining methods in the prediction of Dementia: A real-data comparison of the accuracy, sensitivity and specificity of linear discriminant analysis, logistic regression, neural networks, support vector machines, classification trees and random forests. *BMC Res Notes*. 2011; 4:299. Epub 2011/08/19. doi: [10.1186/1756-0500-4-299](https://doi.org/10.1186/1756-0500-4-299) 1756-0500-4-299 [pii]. PMID: [21849043](https://pubmed.ncbi.nlm.nih.gov/21849043/)
23. Pochet NL, Suykens JA. Support vector machines versus logistic regression: improving prospective performance in clinical decision-making. *Ultrasound Obstet Gynecol*. 2006; 27(6):607–8. Epub 2006/05/23. doi: [10.1002/uog.2791](https://doi.org/10.1002/uog.2791) PMID: [16715467](https://pubmed.ncbi.nlm.nih.gov/16715467/)
24. Westreich D, Lessler J, Funk MJ. Propensity score estimation: neural networks, support vector machines, decision trees (CART), and meta-classifiers as alternatives to logistic regression. *J Clin Epidemiol*. 2010; 63(8):826–33. Epub 2010/07/16. doi: [10.1016/j.jclinepi.2009.11.020](https://doi.org/10.1016/j.jclinepi.2009.11.020) S0895-4356(10)00102-2 [pii]. PMID: [20630332](https://pubmed.ncbi.nlm.nih.gov/20630332/)
25. Woo MJ, Reiter JP, Karr AF. Estimation of propensity scores using generalized additive models. *Stat Med*. 2008; 27(19):3805–16. Epub 2008/03/28. doi: [10.1002/sim.3278](https://doi.org/10.1002/sim.3278) PMID: [18366144](https://pubmed.ncbi.nlm.nih.gov/18366144/)
26. Ben Meskina S, editor On the effect of data reduction on classification accuracy. *Information Technology and e-Services (ICITeS), 2013 3rd International Conference on*; 2013: IEEE.
27. United States Census Bureau. American FactFinder 2010 [04/02/2011]. Available from: <http://www2.census.gov/>.
28. Pebesma EJ, Bivand RS. Classes and methods for spatial data in R. *R News* [Internet]. 2005; 5(2). Available from: <http://cran.r-project.org/doc/Rnews/>.
29. Wald R, Waikar SS, Liangos O, Pereira BJ, Chertow GM, Jaber BL. Acute renal failure after endovascular vs open repair of abdominal aortic aneurysm. *Journal of Vascular Surgery*. 2006; 43(3):460–6; discussion 6. Epub 2006/03/08. S0741-5214(05)02087-2 [pii] doi: [10.1016/j.jvs.2005.11.053](https://doi.org/10.1016/j.jvs.2005.11.053) PMID: [16520155](https://pubmed.ncbi.nlm.nih.gov/16520155/)
30. Kidney Disease: Improving Global Outcomes (KDIGO) Acute Kidney Injury Work Group. Clinical Practice Guideline for Acute Kidney Injury. *Kidney inter, Suppl*. 2012; 2(1):1–138.

31. Dombrovskiy VY, Martin AA, Sunderram J, Paz HL. Facing the challenge: decreasing case fatality rates in severe sepsis despite increasing hospitalizations. *Crit Care Med.* 2005; 33(11):2555–62. Epub 2005/11/09. 00003246-200511000-00017 [pii]. PMID: [16276180](#)
32. Agency for Healthcare Research and Quality. Patient safety indicators: technical specifications. Ver. 4.2: Agency for Healthcare Research and Quality; 2010 [cited 2012 April 9]. Available from: <http://www.qualityindicators.ahrq.gov>.
33. Elixhauser A, Steiner C, Harris DR, Coffey RM. Comorbidity Measures for Use with Administrative Data. *Med Care.* 1998; 36(1):8–27. PMID: [9431328](#)
34. Charlson ME, Pompei P, Ales KL, MacKenzie CR. A new method of classifying prognostic comorbidity in longitudinal studies: development and validation. *J Chronic Dis.* 1987; 40(5):373–83. Epub 1987/01/01. PMID: [3558716](#)
35. U.S. Department of Veterans Affairs VHA. National Drug File—Reference Terminology (NDF-RT™) Documentation 2015 [03/03/2015]. Available from: <http://evs.nci.nih.gov/ftp1/NDF-RT/NDF-RT%20Documentation.pdf>
36. Boulle M. A grouping method for categorical attributes having very large number of values. *Lect Notes Artif Int.* 2005; 3587:228–42.
37. Pyle D. Data preparation for data mining: Morgan Kaufmann; 1999.
38. Pang H, Jung SH. Sample size considerations of prediction-validation methods in high-dimensional data for survival outcomes. *Genet Epidemiol.* 2013; 37(3):276–82. Epub 2013/03/09. doi: [10.1002/gepi.21721](#) PMID: [23471879](#)
39. Collins GS, Reitsma JB, Altman DG, Moons KG. Transparent Reporting of a multivariable prediction model for Individual Prognosis Or Diagnosis (TRIPOD): The TRIPOD Statement. *Ann Intern Med.* 2015; 162(1):55–63. doi: [10.7326/M14-0697](#) PMID: [25560714](#)
40. Ng AY, Jordan MI. On Discriminative vs. Generative Classifiers: A comparison of logistic regression and naive Bayes. In: Dietterich TGA, Suzanna and Ghahramani, Zoubin, editor. *Advances in Neural Information Processing Systems 14 (NIPS 2001)*: MIT Press; 2001. p. 841–8.
41. Cortes C, Vapnik V. Support-vector networks. *Mach Learn.* 1995; 20(3):273–97. doi: [10.1007/BF00994018](#)
42. Hastie T, Tibshirani R. *Generalized additive models.* 1st ed. London; New York: Chapman and Hall; 1990. xv, 335 p. p.
43. Wood SN. Fast stable restricted maximum likelihood and marginal likelihood estimation of semiparametric generalized linear models. *J R Stat Soc B.* 2011; 73:3–36. doi: [10.1111/j.1467-9868.2010.00749.x](#)
44. Domingos P, Pazzani M. On the optimality of the simple Bayesian classifier under zero-one loss. *Mach Learn.* 1997; 29(2–3):103–30. doi: [10.1023/A:1007413511361](#)
45. Verplancke T, Van Looy S, Benoit D, Vansteelandt S, Depuydt P, De Turck F, et al. Support vector machine versus logistic regression modeling for prediction of hospital mortality in critically ill patients with haematological malignancies. *Bmc Med Inform Decis.* 2008; 8. Artn 56 doi: [10.1186/1472-6947-8-56](#)
46. Mittag F, Buchel F, Saad M, Jahn A, Schulte C, Bochdanovits Z, et al. Use of support vector machines for disease risk prediction in genome-wide association studies: concerns and opportunities. *Hum Mutat.* 2012; 33(12):1708–18. Epub 2012/07/11. doi: [10.1002/humu.22161](#) PMID: [22777693](#)
47. Yu W, Liu T, Valdez R, Gwinn M, Khoury MJ. Application of support vector machine modeling for prediction of common diseases: the case of diabetes and pre-diabetes. *BMC Med Inform Decis Mak.* 2010; 10:16. doi: [10.1186/1472-6947-10-16](#) PMID: [20307319](#)
48. Tibshirani R. Regression Shrinkage and Selection Via the Lasso. *Journal of the Royal Statistical Society, Series B.* 1994; 58:267–8.
49. Richardson R, Westley T, Garipey G, Austin N, Nandi A. Neighborhood socioeconomic conditions and depression: a systematic review and meta-analysis. *Soc Psychiatry Psychiatr Epidemiol.* 2015; 50(11):1641–56. doi: [10.1007/s00127-015-1092-4](#) PMID: [26164028](#)
50. Kovalchik SA, Slaughter ME, Miles J, Friedman EM, Shih RA. Neighbourhood racial/ethnic composition and segregation and trajectories of cognitive decline among US older adults. *J Epidemiol Community Health.* 2015; 69(10):978–84. doi: [10.1136/jech-2015-205600](#) PMID: [26002968](#)
51. Huang R, Moudon AV, Cook AJ, Drewnowski A. The spatial clustering of obesity: does the built environment matter? *J Hum Nutr Diet.* 2015; 28(6):604–12. doi: [10.1111/jhn.12279](#) PMID: [25280252](#)
52. Ramsay SE, Morris RW, Whincup PH, Subramanian SV, Papacosta AO, Lennon LT, et al. The influence of neighbourhood-level socioeconomic deprivation on cardiovascular disease mortality in older age: longitudinal multilevel analyses from a cohort of older British men. *J Epidemiol Community Health.* 2015; 69(12):1224–31. doi: [10.1136/jech-2015-205542](#) PMID: [26285580](#)

53. Airaksinen J, Hakulinen C, Pulkki-Raback L, Lehtimäki T, Raitakari OT, Keltikangas-Jarvinen L, et al. Neighbourhood effects in health behaviours: a test of social causation with repeat-measurement longitudinal data. *Eur J Public Health*. 2015. doi: [10.1093/eurpub/ckv210](https://doi.org/10.1093/eurpub/ckv210)
54. Shariff-Marco S, Yang J, John EM, Kurian AW, Cheng I, Leung R, et al. Intersection of Race/Ethnicity and Socioeconomic Status in Mortality After Breast Cancer. *J Community Health*. 2015; 40(6):1287–99. doi: [10.1007/s10900-015-0052-y](https://doi.org/10.1007/s10900-015-0052-y) PMID: [26072260](https://pubmed.ncbi.nlm.nih.gov/26072260/)
55. Radford PD, Derbyshire LF, Shalhoub J, Fitzgerald JEF. Publication of surgeon specific outcome data: A review of implementation, controversies and the potential impact on surgical training. *International Journal of Surgery*. 2015; 13:211–6. doi: [10.1016/j.ijsu.2014.11.049](https://doi.org/10.1016/j.ijsu.2014.11.049) PMID: [25498494](https://pubmed.ncbi.nlm.nih.gov/25498494/)
56. Glance LG, Kellermann AL, Hannan EL, Fleisher LA, Eaton MP, Dutton RP, et al. The Impact of Anesthesiologists on Coronary Artery Bypass Graft Surgery Outcomes. *Anesthesia & Analgesia*. 2015; 120(3):526–33. doi: [10.1213/ane.0000000000000522](https://doi.org/10.1213/ane.0000000000000522)
57. American College of Surgeons National Surgical Quality Improvement Program. Surgical risk calculator 2007–2015 [12/3/2015]. Available from: <http://riskcalculator.facs.org>.
58. Chapman AD. Principles of data quality: GBIF; 2005.
59. Du Y, Hu W, Shyu L, editors. The effect of data reduction by independent component analysis and principal component analysis in hand motion identification. *Engineering in Medicine and Biology Society, 2004 IEMBS'04 26th Annual International Conference of the IEEE*; 2004: IEEE.
